# Supplementary material for: Robust substrate anchorages of silk lines with extensible nano-fibres
Source: Royal Society of Chemistry journal article supplement (doi:10.1039/d1sm00552a), 2021-01-01
Supplement: d1sm00552a1.csv [file d1sm00552a1.csv]

spec	f	fa
Hickmania	14.8	1.895006402
Hickmania	38.3	5.189701897
Hickmania	9.3	1.60899654
Hickmania	23.9	5.623529412
Hickmania	19.7	3.817829457
Hickmania	9.4	1.558872305
Hickmania	38.2	4.878671775
Hickmania	28.1	3.716931217
Hickmania	15.9	2.062256809
Hickmania	13.4	1.587677725
Hickmania	6	1.115241636
Hickmania	5.3	1.405835544
Hickmania	18.1	4.350961538
Hickmania	14.6	2.065063649
Hickmania	7.4	0.962288687
Hickmania	7.2	2.914979757
Isopeda	11.7	4.795081967
Isopeda	5	1.811594203
Isopeda	17.9	8.774509804
Isopeda	11.4	2.780487805
Isopeda	7.4	1.907216495
Isopeda	11	2.827763496
Isopeda	7.2	7.2
Isopeda	3	2.419354839
Isopeda	9.1	10.34090909
Isopeda	16.6	3.798627002
Isopeda	16.6	4.048780488
Isopeda	27.6	6.715328467
Isopeda	14.1	3.498759305
Isopeda	4.9	2.177777778
Isopeda	7.4	10.1369863
Isopeda	6.7	9.436619718
Isopeda	10.6	2.517814727
Isopeda	7.8	2.460567823
Nephila	14.6	6.134453782
Nephila	25.1	17.43055556
Nephila	2.5	1.689189189
Nephila	10.6	3.241590214
Nephila	19.2	9.411764706
Nephila	31.3	13.72807018
Nephila	25.4	7.277936963
Nephila	8.9	6.449275362
Nephila	2.2	1.692307692
Nephila	13	10.15625
Nephila	14.9	15.52083333
Nephila	24.7	10.04065041
Nephila	18.6	19.57894737
Nephila	7.2	4.186046512
Nephila	1	0.302114804
Nephila	15.1	10
Nephila	24.5	9.040590406
Nephila	23	6.534090909
Nephila	23.2	9.789029536
Nephila	51.4	8.877374784
Nephila	27.9	10.64885496
Nephila	14.6	5.658914729
Nephila	24.6	8.97810219
Nephila	24.4	9.420849421
Nephila	34.6	18.02083333
Kukulcania	2.8	2.208201893
Kukulcania	2.5	1.621271077
Kukulcania	3.5	1.233697568
Kukulcania	2.46	2.048293089
Kukulcania	5.08	3.32460733
Kukulcania	2.76	1.154328733
Kukulcania	2.86	1.658932715
Kukulcania	3.16	2.705479452
Kukulcania	1.6	0.456621005
Kukulcania	2.34	0.49221708
Kukulcania	2.2	0.680482524
Kukulcania	1.6	0.583302953
